# Supplementary material
Source: PubMed Central journal article supplement (PMC6439741)
Supplement: jamafacialplastsurg-21-5-s001.pdf [file jamafacialplastsurg-21-5-s001.pdf]

## Supplementary Online Content

Troiano C, Jaleel Z, Spiegel JH. Association of electronic cigarette vaping and cigarette smoking with random flap viability in rats. *JAMA Facial Plast Surg*. Published online October 18, 2018. 10.1001/jamafacial.2018.1179

### **eFigure.** Study Flowchart

This supplementary material has been provided by the authors to give readers additional information about their work.

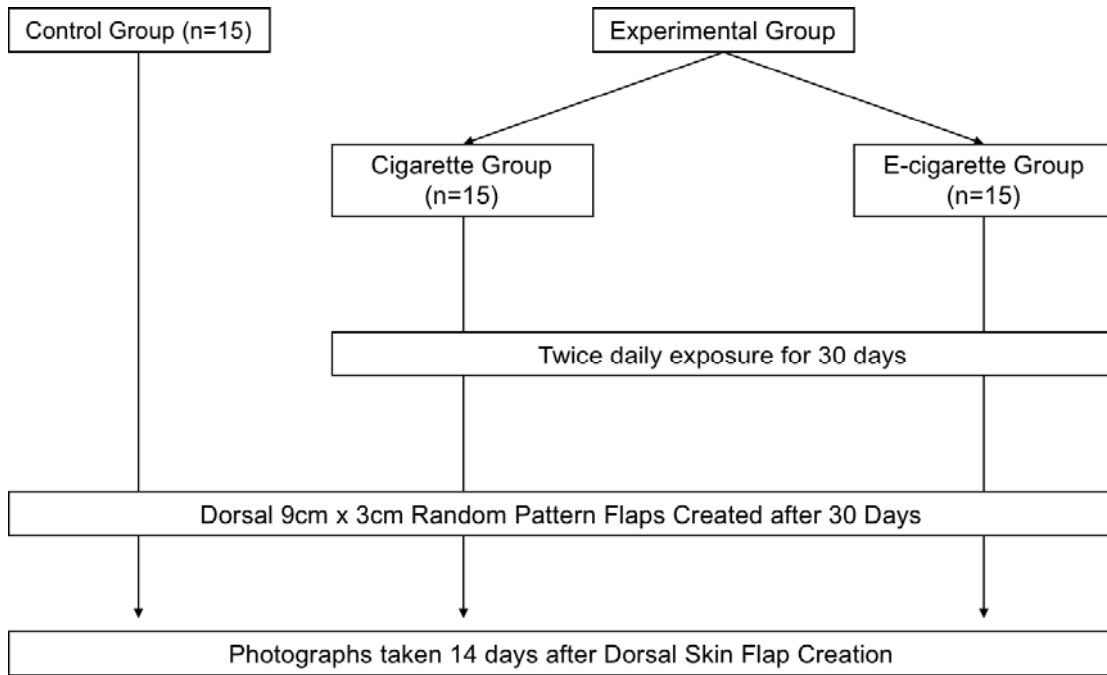

Figure 1. Flowchart for Experimental Design
